# Psychiatrist - Wisconsin

## Inpatient/Outpatient

HealthPartners Medical Group is a top Upper Midwest multispecialty physician practice based in Minnesota and western Wisconsin. Our award-winning Behavioral Health team is 25+ psychiatrists-strong and focused in multidisciplinary inpatient and outpatient settings. Together with social workers, nurses, PAs, therapists and OTs, we provide exceptional care to our community and are dedicated to the health and well-being of our patients.

We have an exciting full-time opportunity for a talented and caring BC/BE Psychiatrist to join our group at the Amery Regional Medical Center (ARMC) in beautiful Amery, Wisconsin. This key position provides direct inpatient and outpatient care as part of our psychiatric treatment program at ARMC and nearby care sites. Leadership and other practice growth opportunities are available.

ARMC is a progressive western Wisconsin community hospital located about an hour east of the Minneapolis/St. Paul metropolitan area. The Amery community offers the variety of a bigger city with a sense of hometown hospitality. With an excellent school system and abundant sporting/outdoor/recreational offerings, Amery is an ideal place to put down family and practice roots. For hospital and community information, visit [www.amerymedicalcenter.org](http://www.amerymedicalcenter.org) and [www.amerywisconsin.org](http://www.amerywisconsin.org).

HealthPartners offers a competitive compensation and benefits package, paid malpractice coverage and a rewarding practice environment with support from our Twin Cities-based group. For consideration, please apply online at [healthpartners.com/careers](http://healthpartners.com/careers), forward your CV and cover letter to [lori.m.fake@healthpartners.com](mailto:lori.m.fake@healthpartners.com), or call Lori at (800) 472-4695 x1. EOE

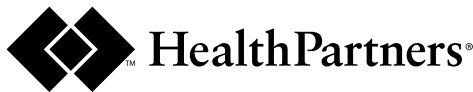

[healthpartners.com](http://healthpartners.com)

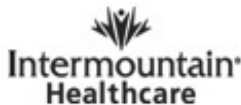

**Intermountain Healthcare  
needs Psychiatrists in:**

**Adult Outpatient – Logan, UT  
Adult Outpatient – Ogden, UT  
Adult Inpatient & Outpatient – Provo, UT  
Adult Outpatient - St. George, UT**

Employment with Intermountain Medical Group. Competitive salary and incentive recognition bonuses. Signing bonus.

Loan repayment money available. Full Intermountain benefits to include defined pension, 401k match & CME.

Relocation provided up to 15k.

Intermountain Healthcare is frequently referenced nationally as one of the leaders in delivering high quality/low cost health care

Contact Intermountain Healthcare  
Physician Recruiting

800-888-3134 Fax: 801-442-3388

[PhysicianRecruit@imail.org](mailto:PhysicianRecruit@imail.org)

<http://physicianjobsintermountain.org>

## Chair

**Department of Psychiatry and Behavioral Sciences  
The University of Texas Medical Branch  
Galveston, Texas**

The University of Texas Medical Branch (UTMB Health) on Galveston Island is seeking candidates to serve as Chair of the Department of Psychiatry and Behavioral Sciences. Candidates with rank of Professor/Associate Professor (tenure appointment commensurate with qualifications) with strong research and administrative experience will be considered. The strongest candidates will also have entrepreneurial and management skills and experience commensurate with leading the department through aggressive expansion as part of our institutional strategic plan. The successful candidate will have demonstrated leadership skills, be nationally recognized for his/her contributions to the field.

The Department of Psychiatry and Behavioral Sciences has a long-standing tradition of excellence in patient care, research, and education. Currently, there are 16 faculty members in the department-9 in adult psychiatry and 7 in child and adolescent psychiatry. In addition to its outpatient and inpatient programs, the department has an expansive tele-psychiatry program as well as a program in which psychiatrists are embedded within several large primary care clinics in order to provide on-site mental health services and consultations. The department has two accredited training programs in general psychiatry and child and adolescent psychiatry.

Interested candidates should send current curriculum vitae, cover letter and the names and contact information for three references to Dara Childress at 301 University Boulevard, Galveston, Texas 77555-0133 or to [dbchildr@utmb.edu](mailto:dbchildr@utmb.edu).

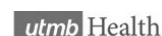

Working together to work wonders™

# Subscription and Business Information

*The American Journal of Psychiatry*, ISSN 0002-953X, is published monthly by the American Psychiatric Association.

The American Psychiatric Association does not hold itself responsible for statements made in its publications by contributors or advertisers. Unless so stated, material in *The American Journal of Psychiatry* does not reflect the endorsement, official attitude, or position of the American Psychiatric Association or of the Journal's Editorial Board.

Periodicals postage paid at Arlington, VA, and additional mailing offices. POSTMASTER: Send address changes to *The American Journal of Psychiatry*, Circulation Department, American Psychiatric Association, 1000 Wilson Blvd., Suite 1825, Arlington, VA 22209-3901.

## Editorial Office

*American Journal of Psychiatry*  
American Psychiatric Association  
1000 Wilson Blvd., Suite 1825  
Arlington, VA 22209-3901  
Phone: (703) 907-7885, (703) 907-7889  
E-mail: [ajp@psych.org](mailto:ajp@psych.org)

## Customer Service

Phone: (800) 368-5777 (tollfree)  
E-mail: [appi@psych.org](mailto:appi@psych.org)

## APA Member Subscription Services

Phone: (888) 35-PSYCH (tollfree)

## Subscriptions

Per year: individual \$285.00,  
international \$429.00

Institutional subscriptions are tier priced. For institutional site license or pricing information, contact (703) 907-8538 or [institutions@psych.org](mailto:institutions@psych.org).

*Additional subscription options, including single issues and student rates*

Contact Customer Service

## Advertising

*Pharmaceutical Print and Online Advertising*  
Frank Cox, Kathleen Harrison, Tim Wolfinger  
Pharmaceutical Media, Inc.  
30 East 33rd Street  
New York, NY 10016  
Phone: (212) 904-0379  
E-mail: [twolfinger@pminy.com](mailto:twolfinger@pminy.com)

*Nonpharmaceutical and Online Sales*

Eamon Woods  
Pharmaceutical Media, Inc.  
E-mail: [ewoods@pminy.com](mailto:ewoods@pminy.com)  
(see address and phone above).

## Permissions and Reprints

Material published in the journals of the American Psychiatric Association and American Psychiatric Publishing is protected by copyright and all rights are reserved. Material may not be reproduced in any form or by any means without written permission from the copyright owner. For permission to reproduce material published by APA, please visit <http://www.appi.org/CustomerService/Pages/Permissions.aspx> for more information. Permission can also be secured through the Copyright Clearance Center ([www.copyright.com](http://www.copyright.com)).

APA does not require that permission be obtained for the photocopying of isolated articles for nonprofit classroom or library reserve use; all fees associated with such permission are waived. This consent does not extend to other kinds of copying, such as copying for general distribution, for advertising or promotional purposes, for creating new collective works, or for resale. Requests for commercial distribution should be directed to (703) 907-7875.

For bulk reprints, please contact Cecilia Stoute, (703) 907-8547; e-mail: [cstoute@psych.org](mailto:cstoute@psych.org).

Indexed in Abstracts for Social Workers, Academic Abstracts, Biological Abstracts, Chemical Abstracts, Chicago Psychoanalytic Literature Index, Cumulative Index to Nursing Literature, Excerpta Medica, Hospital Literature Index, Index Medicus, International Nursing Index, Nutrition Abstracts, Psychological Abstracts, Science Citation Index, Social Science Source, and Social Sciences Index.

Pages are produced by Dartmouth Journal Services, Waterbury, VT, and printed by Dartmouth Printing Company, Hanover, NH, on acid-free paper effective with Volume 169, Number 1, January 2012.

© 2015 American Psychiatric Association.

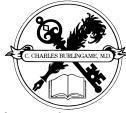

We are pleased to announce that  
**DAVID A. BRENT, M.D.**  
 is the 2015 recipient of the  
**C. CHARLES BURLINGAME, M.D. AWARD**  
 for his outstanding contributions to psychiatry.

**Past Recipients**

- 1988 Robert Kellner, M.D., Ph.D.
- 1989 William T. Carpenter, Jr., M.D.
- 1990 Dennis P. Cantwell, M.D.
- 1991 George E. Vaillant, M.D.
- 1992 A. John Rush, M.D.
- 1993 John C. Nemiah, M.D.
- 1994 Maurice J. Martin, M.D.
- 1995 Otto F. Kernberg, M.D.
- 1996 Charles P. O'Brien, M.D., Ph.D.
- 1997 Glen Owen Gabbard, M.D.
- 1998 Lissy F. Jarvik, M.D., Ph.D.
- 1999 Nancy C. Andreasen, M.D., Ph.D.
- 2000 Lewis L. Judd, M.D.
- 2001 Paul S. Appelbaum, M.D.
- 2002 Charles B. Nemeroff, M.D., Ph.D.
- 2003 Dilip V. Jeste, M.D.
- 2004 David H. Barlow, Ph.D.
- 2005 Herbert D. Kleber, M.D.
- 2006 Daniel N. Stern, M.D.
- 2007 Jerrold F. Rosenbaum, M.D.
- 2008 K. Ranga Rama Krishnan, M.D.
- 2009 David J. Kupfer, M.D.
- 2010 Professor Sir Michael Rutter
- 2011 Jeffrey A. Lieberman, M.D.
- 2012 Judith L. Rapoport, M.D.
- 2013 Nora D. Volkow, M.D.
- 2014 Daniel R. Weinberger, M.D.

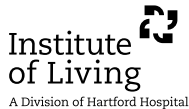

200 Retreat Avenue  
 Hartford, CT 06106  
 1-800-673-2411

A Division of Hartford Hospital

# THIS PLACE IS AMAZING

So is the difference **you** can make.

## Faculty Child and Adolescent Psychiatrist Greenville, SC

Greenville Health System (GHS), the largest healthcare provider in South Carolina, is currently seeking a board certified/board eligible Child Psychiatrist to join our collegial group of 16 psychiatrists.

Under the leadership of Dr. Kenneth Rogers, the department is in an exciting period of expanding its clinical, education, and research mission. Ideal candidates would also have an interest in teaching medical students, residents, and child psychiatry fellows at University of South Carolina School of Medicine-Greenville, located on GHS' Greenville Memorial Medical Campus. Candidates should be eligible for faculty appointments at the assistant or associate professor level.

This position comes with excellent compensation packages, paid malpractice insurance, paid interview and relocation costs plus a host of other benefits.

GHS employs over 12,000 people including 800+ physicians on staff. The system includes clinically excellent facilities with 1,662 beds on 7 campuses. We offer 15 residency and fellowship programs, as well as one of the nation's newest 4-year medical education programs: University of South Carolina School of Medicine-Greenville, located on GHS' Greenville Memorial Medical Campus. We are a designated Level I Emergency Trauma Center and also have a separate research facility.

Greenville, South Carolina is a beautiful place to live and work and the GHS catchment area is 1.3 million people. Greenville is located on the I-85 corridor between Atlanta and Charlotte, and is one of the fastest growing areas in the country. We are ideally situated near beautiful mountains, beaches and lakes. You are able to enjoy a diverse and thriving economy, excellent quality of life and wonderful cultural and educational opportunities.

**Please submit letter of interest and current CV to Caroline Bates, cbates@ghs.org, Ph: 877-360-5579.**

Greenville Health System is an equal opportunity employer which proudly values diversity. Candidates of all backgrounds are encouraged to apply.

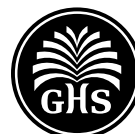

**GREENVILLE HEALTH SYSTEM**

Are You Ready to Take the Next Step in Your Psychiatric Career?

Become a **Fellow** of the **American Psychiatric Association**

Earn the **FAPA** or **IFAPA** designation

or **International Fellow**

We've made it even **EASIER** to apply!

For more information and to apply, visit [www.psychiatry.org/BecomeaFellow](http://www.psychiatry.org/BecomeaFellow)

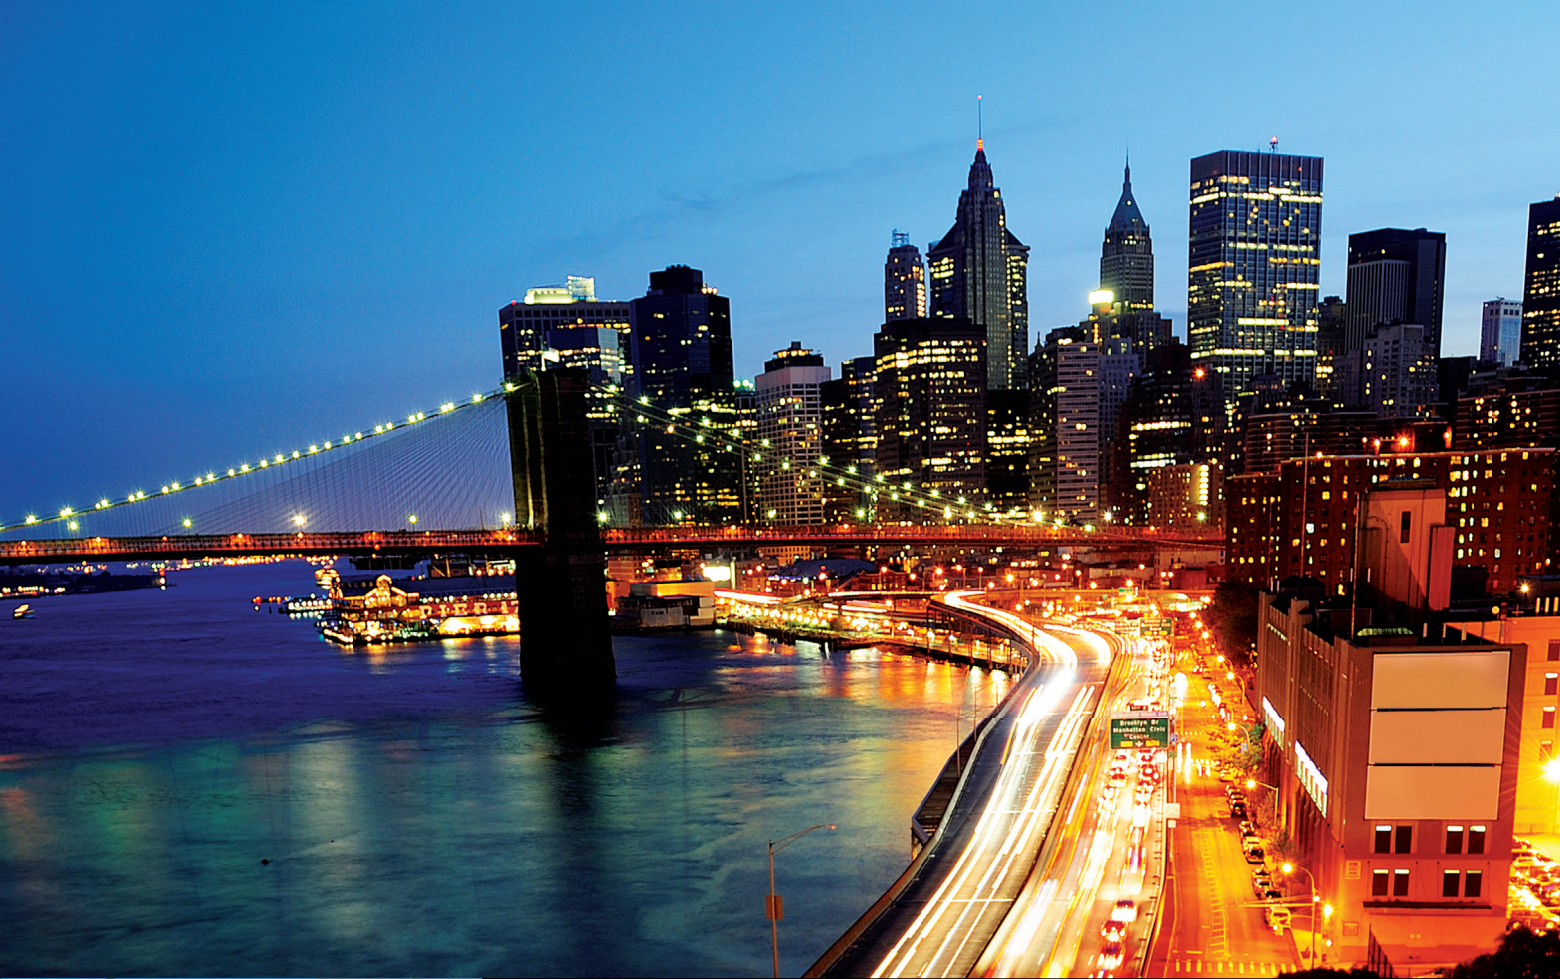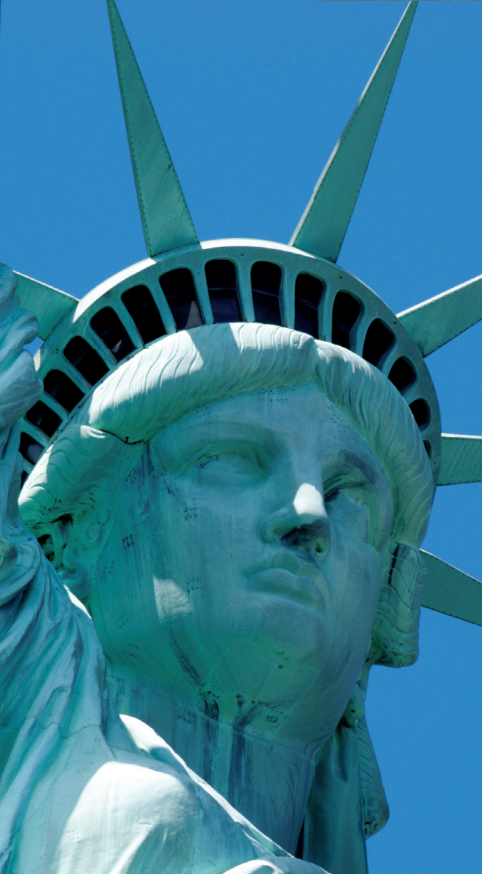

# When Good Care Confronts Red Tape:

Navigating the System for Our Patients and Our Practice

**67<sup>TH</sup>** INSTITUTE ON  
*PSYCHIATRIC SERVICES*

**NEW YORK CITY | OCTOBER 8-11, 2015**  
**SHERATON NEW YORK HOTEL & TOWERS**

APA's Leading Educational Conference on Public, Community and Clinical Psychiatry

For more info, visit  
[psych.org/ips](http://psych.org/ips)

American  
Psychiatric  
Association

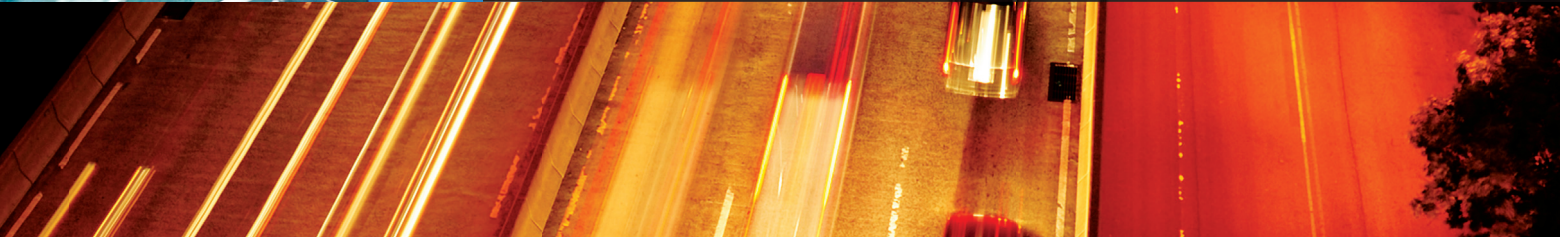

Source: http://ajp.psychiatryonline.org/doi/suppl/10.1176/ajp.2015.172.issue-6/suppl_file/back.pdf
