JUNE 2015 | VOLUME 172 | NUMBER 6

# The American Journal of Psychiatry

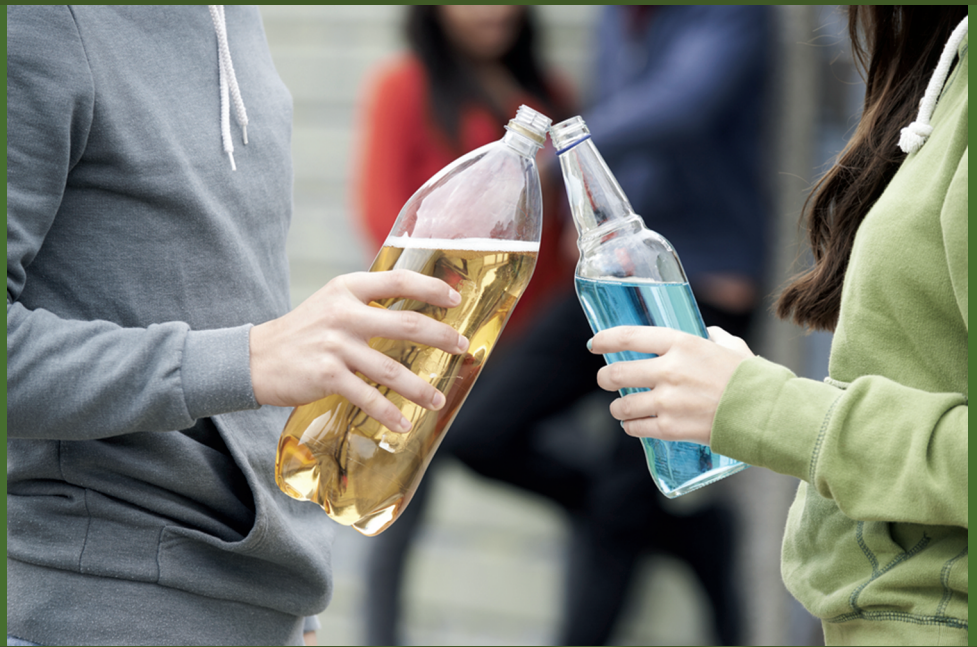

Alcohol Use Disorders: Tracts, Twins, and Trajectories

Brain Development in Heavy-Drinking Adolescents

Association of Protein Phosphatase *PPM1G*  
With Alcohol Use Disorder and Brain Activity During  
Behavioral Control in a Genome-Wide Methylation Analysis

CBT for Adolescents With Anxiety:  
Mature Yet Still Developing

Official Journal of the American Psychiatric Association  
[ajp.psychiatryonline.org](http://ajp.psychiatryonline.org)
