## PERSPECTIVAS

### EDITORIALES

- 499 Trastornos por abuso de alcohol: Tractos, gemelos y trayectorias**  
*George F. Koob, Ph.D.* **AUDIO**
- 502 Requiere atención: La asociación de la proporción clozapina/NDMC en el plasma con la memoria de trabajo**  
*Herbert Y. Meltzer, M.D.*
- 505 El papel de los estimulantes en la depresión tardía**  
*J. Craig Nelson, M.D.*
- 508 Padres y genes y sus efectos en el alcohol, las drogas y los delitos en las familias triparentales**  
*Anita Thapar, M.D., Ph.D.*

### INTROSPECCIÓN

- 510 Acerca de ser un enfermo crónico III**  
*Mark D. Rego, M.D.*

### CONFERENCIA DE CASO CLÍNICO

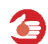

- 512 Atención psiquiátrica durante el tratamiento de la hepatitis C: El papel cambiante de los psiquiatras en la era de los antivirales de acción directa**  
*Sanjeev Sockalingam, M.D., et al.* **AUDIO**
- Consejo clínico:** Las secuelas neuropsiquiátricas del tratamiento de la hepatitis C ahora son menos frecuentes con los nuevos medicamentos, en comparación con Interferón. Actualmente los psiquiatras, en lugar de seleccionar quién puede tolerar el tratamiento, pueden fomentar la adherencia al tratamiento para todos los pacientes infectados y manejar las interacciones entre medicamentos, incluyendo los que implican inhibidores de citocromo P450 3A4.

### IMÁGENES EN PSIQUIATRÍA

- 517 La piedra que lamenta a sus víctimas: Haití todavía se está recuperando de sus heridas y traumas 5 años después del terremoto de 2010**  
*Jude Mary Cénat, Ph.D., et al.*

### RESÚMENES Y RESEÑAS

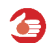

- 519 TCC para adolescentes con ansiedad: Maduros pero todavía en crecimiento**  
*Philip C. Kendall, Ph.D., y Jeremy S. Peterman, M.A.* **AUDIO**
- Consejo clínico:** Alrededor de dos tercios de los adolescentes con trastornos de ansiedad responden a la terapia cognitivo-conductual (TCC); las tasas de respuesta son incluso más altas cuando la TCC se combina con medicación. Los adolescentes pueden beneficiarse especialmente de los formatos alternativos que permite la flexibilidad de la TCC y de la relación con un adulto externo a la familia.

ARTÍCULOS

- 531 Desarrollo cerebral en adolescentes consumidores de alcohol en exceso**  
*Lindsay M. Squeglia, Ph.D., et al.* **EMC • AUDIO • VIDEO**  
**Consejo clínico:** Los efectos negativos del exceso de alcohol en el funcionamiento cognitivo, social y académico de los adolescentes puede ser debido a alteraciones de los cambios normales del desarrollo cerebral. El consumo excesivo de alcohol acelera la reducción de la sustancia gris cortical y atenúa el aumento de la sustancia blanca que típicamente ocurre durante la adolescencia.
- 543 Asociación de la proteína fosfatasa PPM1G con el trastorno por abuso del alcohol y actividad cerebral durante el control del comportamiento en un análisis de metilación del genoma completo**  
*Barbara Ruggeri, Ph.D., et al.* **EDITORIAL • AUDIO**  
 La hipermetilación en un gen implicado en los trastornos por abuso de alcohol está asociada con el aumento en los adolescentes del hábito de beber, la impulsividad y la hiperactivación en el núcleo subtalámico derecho durante una tarea de impulsividad.
- 553 Familias triparentales: Un nuevo diseño genético-epidemiológico aplicado al abuso de sustancias, trastornos por abuso de alcohol y conducta delictiva en una muestra nacional sueca**  
*Kenneth S. Kendler, M.D., et al.* **EDITORIAL**  
 De acuerdo con la transmisión genética, la similitud entre los hijos y los padres en cuanto a los trastornos por abuso de sustancias y la delincuencia fue más marcada para las madres biológicas que viven en el mismo hogar, intermedia para padres biológicos que viven en otro sitio, y más débil para los padrastros. Sin embargo, un padrastro con una conducta delictiva en la familia se relacionó con mayor uso de sustancias y comportamiento delictivo.
- 561 Citalopram, metilfenidato o la combinación de ambos en la depresión geriátrica: Un ensayo aleatorizado, doble ciego, controlado con placebo**  
*Helen Lavretsky, M.D., et al.* **EDITORIAL • EMC • AUDIO • VIDEO**  
**Consejo clínico:** La mejoría en pacientes mayores deprimidos es mayor y la remisión es más probable con la combinación de citalopram y metilfenidato que con cualquiera de los dos por separado. La combinación también produce cambios más rápido que solamente con citalopram. Los tres tratamientos mejoran el funcionamiento cognitivo.
- 570 La microangiopatía cerebral y su asociación con mayor incidencia de los síntomas depresivos en una población general mayor: El estudio AGES de Reikiavik**  
*Thomas T. van Sloten, M.D., et al.*  
 El seguimiento de 5 años de una cohorte de población mayor saludable reveló que la incidencia de los síntomas depresivos estaba asociada con el aumento de volumen de hipersensibilidad de la materia blanca, nuevos infartos subcorticales, nuevos espacios Virchow-Robin y menor volumen cerebral al inicio del estudio y con el transcurso del tiempo.
- 579 Predicción del desempeño de la memoria de trabajo en esquizofrenia a partir de la proporción de clozapina con respecto a la N-desmetilclozapina en el plasma**  
*Tarek K. Rajji, M.D., et al.* **EDITORIAL • EMC • AUDIO**  
**Consejo clínico:** La memoria de trabajo en pacientes que toman clozapina está inversamente relacionada con los niveles séricos de clozapina a su metabolito N-desmetilclozapina, que tienen efectos opuestos en los receptores de acetilcolina muscarínicos M1. Monitorear la proporción de clozapina/N-desmetilclozapina puede ayudar a explicar los cambios cognitivos y a establecer las pautas de dosaje.

COMUNICADOS Y ACTUALIZACIONES

CARTAS AL EDITOR

- 586 El tratamiento con monoterapia de antidepresivos no está asociado con la manía en el Trastorno Bipolar I**  
*Michael J. Ostacher, M.D., M.P.H., M.M.Sc., et al.*
- 586 Respuesta a Ostacher et al.**  
*Mikael Landén, M.D., Ph.D., y Alexander Viktorin, M.Sc.*

**587 Medicina basada en la evidencia y experticia clínica**

*Michael Saraga, M.D.*

**588 Respuesta a Saraga**

*Delbert G. Robinson, M.D., et al.*

**FÓRUM BIBLIOGRÁFICO**

**589 Psicoterapia centrada en la transferencia para el trastorno límite de la personalidad: Una guía clínica**

*Robert E. Feinstein, M.D.*

**590 Al servicio de los Amish: Una guía cultural para profesionales**

*Allison M. Heru, M.D.*

**592 Libros recibidos**

**OTROS TEMAS DE INTERÉS**

**594 Educación Médica Continuada**

**A7 Contenidos de Shanghai Archires of Psychiatry**

**A8 Informacion Empresarial**

**Cubierta:** Las causas y consecuencias del consumo de alcohol en la adolescencia son examinadas por Squeglia et al. (p. 531), que midieron el desarrollo cerebral en el transcurso de la adolescencia, y por Ruggeri et al. (p. 543), que identificaron un polimorfismo genético relacionado con el aumento temprano del consumo de alcohol, impulsividad y mayor reactividad del núcleo subtalámico. En un editorial (p. 499) George Koob, director del Instituto Nacional Estadounidense de Abuso de Alcohol y Alcoholismo, explica cómo convergen estos hallazgos.

Article content that addresses **Core Competencies**, defined by the Accreditation Council of Graduate Medical Education and the American Board of Medical Specialties, is indicated by the following symbols:

-  Professionalism
-  Patient Care and Procedural Skills
-  Medical Knowledge
-  Practice-Based Learning and Improvement
-  Interpersonal and Communication Skills
-  Systems-Based Practice.

More information is available at [www.abms.org/maintenance\\_of\\_certification/MOC\\_competencies.aspx](http://www.abms.org/maintenance_of_certification/MOC_competencies.aspx)

**AUDIO** Highlighted in AJP Audio, a downloadable .mp3 file available at [ajp.psychiatryonline.org](http://ajp.psychiatryonline.org)

**CME** A course covering the content of this article is available online for paid subscribers to the AJP CME Course program

**EDITORIAL** Discussed in one of the issue's editorials

**VIDEO** Highlighted online by Deputy Editor Daniel S. Pine, M.D.

**La Tabla de Contenidos y resumens de Este Número Está Disponible en Español**

*(This issue's Table of Contents and abstracts are available in Spanish)*

Translation presented in collaboration with the Office of Global Health, Rutgers-Robert Wood Johnson Medical School

Support for this effort provided by ACTA Colombia.

**Translation courtesy of**

**Sergi Casals, M.A.**, Garuna, Medellín, Colombia ([www.garunaeditors.com](http://www.garunaeditors.com))

**Carlos Lopez Jaramillo, M.D.**, Universidad de Antioquia, Medellín, Colombia

**Javier I. Escobar, M.D., M.Sc.**, Rutgers-Robert Wood Johnson Medical School

## Desarrollo cerebral en adolescentes consumidores de alcohol en exceso

Lindsay M. Squeglia, Ph.D., Susan F. Tapert, Ph.D., Edith V. Sullivan, Ph.D., Joanna Jacobus, Ph.D., M.J. Meloy, Ph.D., Torsten Rohlfing, Ph.D., Adolf Pfefferbaum, M.D.

**Objetivo:** El consumo excesivo de alcohol durante la adolescencia puede alterar la trayectoria del desarrollo cerebral normal. Los autores midieron cambios en morfometría cerebral regional en cada individuo durante intervalos más largos que los que se habían reportado en estudios anteriores y en muestras más grandes de adolescentes, y evaluaron las diferencias entre los adolescentes que mantuvieron abstinencia y los que consumieron en exceso durante la adolescencia, y las diferencias entre sexos.

**Método:** Los autores examinaron las trayectorias del volumen de sustancia gris y blanca en 134 adolescentes, de los cuales 75 se convirtieron en consumidores de alcohol en exceso y 59 permanecieron sin consumir o consumieron con moderación durante aproximadamente 3,5 años. A cada uno se le tomaron entre 2 y 6 resonancias magnéticas (IRM) entre los 12 y los 14 años y se le hizo seguimiento por hasta 8 años. El volumen del neocórtex, la allocorteza y las estructuras de sustancia blanca se midió utilizando parcelación basada en atlas, con registro longitudinal. Modelos lineales de efectos mixtos describieron las diferencias en las trayectorias de los consumidores en exceso y de los no consumidores con los cambios de edad; análisis secundarios consid-

eraron cómo el consumo de otras drogas contribuye a los efectos identificados del consumo de alcohol.

**Resultados:** Los adolescentes que consumían alcohol en exceso demostraron una reducción acelerada de la sustancia gris en los volúmenes corticales laterales temporal y frontal y crecimiento atenuado de la sustancia blanca del cuerpo calloso y el puente troncoencefálico. Estos resultados permanecieron prácticamente igual cuando se examinó el consumo de marihuana y otras drogas. Tanto hombres como mujeres que consumían alcohol tuvieron patrones similares en las anomalías del desarrollo de las trayectorias.

**Conclusiones:** El análisis longitudinal permitió detectar la reducción acelerada del volumen típico en los volúmenes corticales frontal y temporal y el crecimiento acelerado en las principales estructuras de sustancia blanca en adolescentes que empezaron a consumir en exceso. Estos resultados son un llamado de atención con respecto al consumo excesivo de alcohol en la adolescencia, tanto si dicho consumo es la causa única o una causa entre otras en estas alteraciones del desarrollo cerebral.

*(Am J Psychiatry 2015; 172:531–542)*

## Asociación de la proteína fosfatasa *PPM1G* con el trastorno por abuso del alcohol y actividad cerebral durante el control del comportamiento en un análisis de metilación del genoma completo

Barbara Ruggeri, Ph.D., Charlotte Nymberg, Ph.D., Eero Vuoksimaa, Ph.D., Anbarasu Lourdasamy, Ph.D., Cybele P. Wong, Ph.D., Fabiana M. Carvalho, Ph.D., Tianye Jia, Ph.D., Anna Cattrell, Ph.D., Christine Macare, M.Sc., Tobias Banaschewski, M.D., Ph.D., Gareth J. Barker, Ph.D., Arun L.W. Bokde, Ph.D., Uli Bromberg, M.Sc., Christian Büchel, M.D., Ph.D., Patricia J. Conrod, Ph.D., Mira Fauth-Bühler, Ph.D., Herta Flor, Ph.D., Vincent Frouin, Ph.D., Jürgen Gallinat, M.D., Ph.D., Hugh Garavan, Ph.D., Penny Gowland, Ph.D., Andreas Heinz, M.D., Ph.D., Bernd Ittermann, Ph.D., Jean-Luc Martinot, M.D., Ph.D., Frauke Nees, Ph.D., Zdenka Pausova, M.D., Ph.D., Tomáš Paus, M.D., Ph.D., Marcella Rietschel, Ph.D., Trevor Robbins, Ph.D., Michael N. Smolka, M.D., Ph.D., Rainer Spanagel, Ph.D., Georgy Bakalkin, Ph.D., Jonathan Mill, Ph.D., Wolfgang H. Sommer, Ph.D., Richard J. Rose, Ph.D., Jia Yan, Ph.D., Fazil Aliev, Ph.D., Danielle Dick, Ph.D., Jaakko Kaprio, M.D., Ph.D., Sylvane Desrivieres, Ph.D., Gunter Schumann, M.D., the IMAGEN Consortium

**Objetivo:** El componente genético del trastorno por abuso de alcohol es sustancial, pero la discordancia en gemelos monocigóticos indica que las diferencias no heredables juegan un papel que podría ser mediado por la epigenética. A pesar de la creciente evidencia que asocia la epigenética con los trastornos psiquiátricos, no está claro cómo la epigenética, específicamente la metilación del ADN, está relacionada con la función y el comportamiento cerebrales, incluyendo el comportamiento con relación al consumo de alcohol.

**Método:** Los autores realizaron un análisis de metilación del ADN del genoma completo de 18 pares de gemelos homocigóticos discordantes en cuanto al consumo de alcohol y validaron regiones metiladas diferencialmente. Después de la validación, los autores caracterizaron estas regiones metiladas diferencialmente utilizando evaluación de rasgos de personalidad e IRM funcional en una muestra de 499 adolescentes.

**Resultados:** La hipermetilación en el sitio (locus) del gen de 3'-proteína fosfatasa 1G (*PPM1G*) se asoció con el trastorno por abuso de alcohol. Los autores encontraron una asociación de la hipermetilación del gen *PPM1G* con el aumento temprano del consumo de alcohol y con impulsividad aumentada. También observaron una asociación de la hipermetilación del gen *PPM1G* con una mayor respuesta dependiente del nivel de oxígeno en la sangre en el núcleo subta lámico derecho durante una tarea de impulsividad.

**Conclusiones:** En general, los autores ofrecen la primera evidencia de un marcador epigenético asociado con el consumo de alcohol y su fenotipo neurocomportamental subyacente.

(*Am J Psychiatry* 2015; 172:543–552)

# Familias triparentales: Un nuevo diseño genético-epidemiológico aplicado al abuso de sustancias, trastornos por abuso de alcohol y conducta delictiva en una muestra nacional sueca

Kenneth S. Kendler, M.D.; Henrik Ohlsson, Ph.D.; Jan Sundquist, M.D., Ph.D.; Kristina Sundquist, M.D., Ph.D.

**Objetivo:** Los autores tenían como objetivo aclarar las fuentes de la semejanza entre padres e hijos en cuanto al abuso de sustancias, los trastornos por consumo de alcohol y la conducta delictiva.

**Método:** Haciendo uso de registros nacionales, los autores identificaron las tasas de abuso de drogas, trastornos por abuso de alcohol y conducta delictiva en 41.360 personas suecas que habían nacido entre 1960 y 1990 y crecido en familias triparentales que consistían en una madre biológica que los había criado, un padre biológico que no vivía con ellos, y un padrastro.

**Resultados:** Al examinar cada uno de los síndromes por separado, se estudiaron las tasas de riesgo de abuso de drogas en los hijos de padres con abuso de drogas. Las tasas más altas correspondían a las madres (2,80, IC 95%=2,23–3,38), las tasas intermedias a los padres que no vivían en el hogar (2,45, IC 95%=2,14–2,79), y las más bajas a los padrastros (1,99, IC 95%=1,55–2,56). El mismo patrón se encontró para los trastornos de abuso de alcohol (2,23, IC 95%=1,93–2,58; 1,84, IC 95%=1,69–2,00; y 1,27, IC 95%=1,12–1,43) y conducta delictiva (1,55, IC 95%=1,44–1,66; 1,46, IC 95%=1,40–

1,52; y 1,30, IC 95%=1,23–1,37). Al examinar los tres síndromes conjuntamente, la especificidad de la transmisión trans-generacional fue más alta para las madres, intermedia para los padres que no viven en el hogar y más baja para los padrastros. Análisis de familias intactas y otros padres que no vivían en el hogar y padrastros mostraron una transmisión trans-generacional similar para estos síndromes en madres y padres, corroborando la representatividad de los resultados de las familias triparentales.

**Conclusiones:** Una fortaleza importante del diseño triparental es la inclusión, dentro de una sola familia, de padres que les dan a sus hijos, hasta una primera aproximación, genes y crianza, solamente genes y solamente crianza. Para el abuso de drogas, los trastornos por abuso de alcohol y la conducta delictiva, los resultados de este estudio sugieren que la transmisión de padres a hijos implica procesos tanto genéticos como del entorno, siendo más importantes los factores genéticos. Estos resultados deben interpretarse en el contexto de las fortalezas y las limitaciones de los datos de los registros nacionales.

(*Am J Psychiatry* 2015; 172:553–560)

# Citalopram, metilfenidato, o la combinación de ambos en la depresión geriátrica: Un ensayo aleatorizado, doble ciego, controlado con placebo

Helen Lavretsky, M.D.; Michelle Reinlieb, Ph.D.; Natalie St. Cyr, M.A.; Prabha Siddarth, Ph.D.; Linda M. Ercoli, Ph.D.; Damla Senturk, Ph.D.

**Objetivo:** Los autores evaluaron el potencial del metilfenidato para mejorar la respuesta antidepresiva al citalopram, según la evaluación de resultados clínicos y cognitivos, en pacientes mayores deprimidos.

**Método:** Los autores realizaron un ensayo de 16 semanas, aleatorizado, doble ciego, controlado con placebo para la depresión geriátrica en 143 pacientes mayores ambulatorios diagnosticados con depresión mayor y compararon la respuesta al tratamiento en tres grupos de tratamiento: metilfenidato más placebo (N=48), citalopram más placebo (N=48) y citalopram más metilfenidato (N=47). La medida de resultado primario fue el cambio en la severidad de la depresión. La remisión se definió como un puntaje de 6 o inferior en la Escala de Depresión de Hamilton. Los resultados secundarios incluían las mediciones de ansiedad, apatía, calidad de vida y cognición.

**Resultados:** Las dosis diarias variaron de 20 mg a 60 mg para el citalopram (media=32 mg) y de 5 mg a 40 mg para el metilfenidato (media=16 mg). Todos los grupos mostraron

una mejoría significativa en la severidad de la depresión y en el desempeño cognitivo. Sin embargo, la mejoría en la severidad de la depresión y el puntaje de mejora en la Escala de Impresión Clínica Global fue más prominente en el grupo de citalopram más metilfenidato en comparación con los otros dos grupos. Además, la tasa de mejoría en el grupo de citalopram más metilfenidato fue significativamente más alta que en el grupo de citalopram más placebo en las primeras cuatro semanas del ensayo. No se hallaron diferencias en cuanto a mejoría cognitiva o número de efectos secundarios entre los grupos.

**Conclusiones:** El tratamiento combinado con citalopram y metilfenidato demostró un perfil de respuesta clínica mejorada en estado de ánimo y bienestar, y una tasa más alta de remisión, comparado con los dos grupos de una sola medicación. Todos los tratamientos condujeron a una mejoría en el funcionamiento cognitivo, aunque el aumento con metilfenidato no ofreció beneficios adicionales.

*(Am J Psychiatry 2015; 172:561–569)*

# La microangiopatía cerebral y su asociación con mayor incidencia de los síntomas depresivos en una población general mayor: El estudio AGES de Reikiavik

Thomas T. van Sloten, M.D.; Sigurdur Sigurdsson, M.Sc.; Mark A. van Buchem, M.D., Ph.D.; Caroline L. Phillips, M.S.; Palmi V. Jonsson, M.D.; Jie Ding, Ph.D.; Miranda T. Schram, Ph.D.; Tamara B. Harris, M.D., M.S.; Vilmundur Gudnason, M.D., Ph.D.; Lenore J. Launer, Ph.D.

**Objetivo:** La hipótesis de la depresión vascular postula que la microangiopatía cerebral conduce a síntomas depresivos por disrupción de estructuras cerebrales implicadas en la regulación del ánimo. Sin embargo, son escasos los datos longitudinales sobre la asociación entre la microangiopatía cerebral y los síntomas depresivos. Los autores investigaron la asociación entre la microangiopatía cerebral y los síntomas depresivos incidentes.

**Método:** Se obtuvieron datos longitudinales del Estudio de Reikiavik sobre edad, genes/entorno y susceptibilidad (*Age, Gene/Environment Susceptibility*) de 1.949 participantes sin demencia y sin síntomas depresivos al inicio del estudio (edad media: 74,6 años [DE=4,6]; mujeres, 56,6%). Los marcadores de IRM de microangiopatía cerebral detectados al inicio del estudio (2002–2006) y en el seguimiento (2007–2011) incluían volumen de hiperintensidad de sustancia blanca, infartos subcorticales, microsangrados cerebrales, espacios de Virchow-Robin, y el volumen total del parénquima cerebral. Los síntomas depresivos incidentes se definieron a partir de un puntaje  $\geq 6$  en la Escala de Depresión Geriátrica de 15 puntos y/o el uso de medicación anti-depresiva.

**Resultados:** Se presentaron síntomas depresivos en el 10,1% de los participantes. La asociación con un inicio más fuerte de los síntomas depresivos fue significativa para los participantes con el aumento de 1 desviación estándar en el volumen de hiperintensidad de la sustancia blanca a lo largo del tiempo, nuevos infartos subcorticales, nuevos espacios de Virchow-Robin, el volumen cerebral total más bajo por 1 desviación estándar al inicio del estudio, y una reducción de 1 desviación estándar del volumen cerebral total a lo largo del tiempo, después de los ajustes para función cognitiva y factores socio-demográficos y cardiovasculares. Los resultados fueron cualitativamente similares cuando el cambio en el puntaje de la Escala de depresión geriátrica a lo largo del tiempo se utilizó como resultado en lugar de los síntomas depresivos incidentes.

**Conclusiones:** La mayoría de los marcadores de progresión de la microangiopatía cerebral a lo largo del tiempo y algunos marcadores de la microangiopatía cerebral al inicio del estudio están asociados con nuevos síntomas depresivos que se desarrollan de manera simultánea. Estos hallazgos apoyan la hipótesis de la depresión vascular.

(*Am J Psychiatry* 2015; 172:570–578)



## Predicción del desempeño de la memoria de trabajo en esquizofrenia en relación con la proporción de clozapina con respecto a *N*-desmetilclozapina en plasma

Tarek K. Rajji, M.D.; Benoit H. Mulsant, M.D., M.S.; Simon Davies, D.M., M.B.B.S.; Sawsan M. Kalache, M.D.; Christopher Tsoutsoulas, B.Sc.(Hons); Bruce G. Pollock, M.D., Ph.D.; Gary Remington, M.D., Ph.D.

**Objetivo:** Se cree que el potente antagonismo de la clozapina a los receptores muscarínicos M1 empeora los déficits de la memoria de trabajo asociados con la esquizofrenia. En contraste, se cree que su principal metabolito, la *N*-desmetilclozapina (NDMC), mejora la memoria de trabajo por medio de la actividad agonista del su receptor M1. La hipótesis de los autores fue que la proporción de las concentraciones de clozapina y NDMC séricas estaría inversamente asociada con el desempeño de la memoria de trabajo en esquizofrenia.

**Método:** Treinta pacientes con esquizofrenia o trastorno esquizoafectivo que estaban recibiendo monoterapia de clozapina antes de acostarse completaron la batería cognitiva consenso MATRICS (MCCB, *MATRICS Consensus Cognitive Battery*) el mismo día en que se les tomó una muestra de sangre para evaluar las concentraciones de clozapina y NDMC y la actividad sérica anticolinérgica.

**Resultados:** La proporción clozapina/NDMC fue asociada significativamente y negativamente con el desempeño de la memoria de trabajo después de controlar la edad, el género,

la educación y la severidad de los síntomas. No se encontraron asociaciones significativas entre las concentraciones individuales de clozapina y de NDMC y el desempeño de la memoria de trabajo. La actividad sérica anticolinérgica se asoció de manera significativa con la concentración de clozapina, pero no con el desempeño de la memoria de trabajo ni con la concentración de NDMC. No se encontraron asociaciones significativas entre ninguna medida farmacológica y el desempeño en otros dominios cognitivos de la batería MCCB

**Conclusiones:** Este estudio basado en una hipótesis confirma que la proporción clozapina/NDMC es un predictor fuerte del desempeño de la memoria de trabajo en pacientes con esquizofrenia. Este hallazgo sugiere que manipular la proporción de clozapina/NDMC podría mejorar la cognición en pacientes con esquizofrenia tratados con clozapina. También apoya el estudio de agentes pro colinérgicos, como los moduladores alostéricos positivos del receptor M1, para mejorar la cognición en la esquizofrenia.

(*Am J Psychiatry* 2015; 172:579–585)
